# Supplementary material for: pH-dependent solvothermal formation of two different 3D multiple interpenetrating nets from the same components of Zn(NO3)2, 1,3-benzenedicarboxylate and 1,4-bis[2-(4-pyridyl)ethenyl]benzene
Source: Royal Society of Chemistry journal article supplement (doi:10.1039/b924647a), 2010-01-01

## Electronic Supporting Information (ESI)

**pH-Dependent solvothermal formation of two different 3D multiple interpenetrating nets from the same components of  $\text{Zn}(\text{NO}_3)_2$ , 1,3-benzenedicarboxylate and 1,4-bis[2-(4-pyridyl)ethenyl]benzene**

Dong Liu,<sup>a</sup> Zhi-Gang Ren,<sup>a</sup> Hong-Xi Li,<sup>a</sup> Yang Chen,<sup>a</sup> JingWang,<sup>a</sup> Yong Zhang,<sup>a</sup> and Jian-Ping Lang<sup>\*ab</sup>

<sup>a</sup> *College of Chemistry, Chemical Engineering and Materials Science, Suzhou University, Suzhou 215123, Jiangsu, P. R. China*

<sup>b</sup> *State Key Laboratory of Organometallic Chemistry, Shanghai Institute of Organic Chemistry, Chinese Academy of Sciences, Shanghai 200032, P. R. China*

**Fig. S1** The TGA curves for the two title compounds

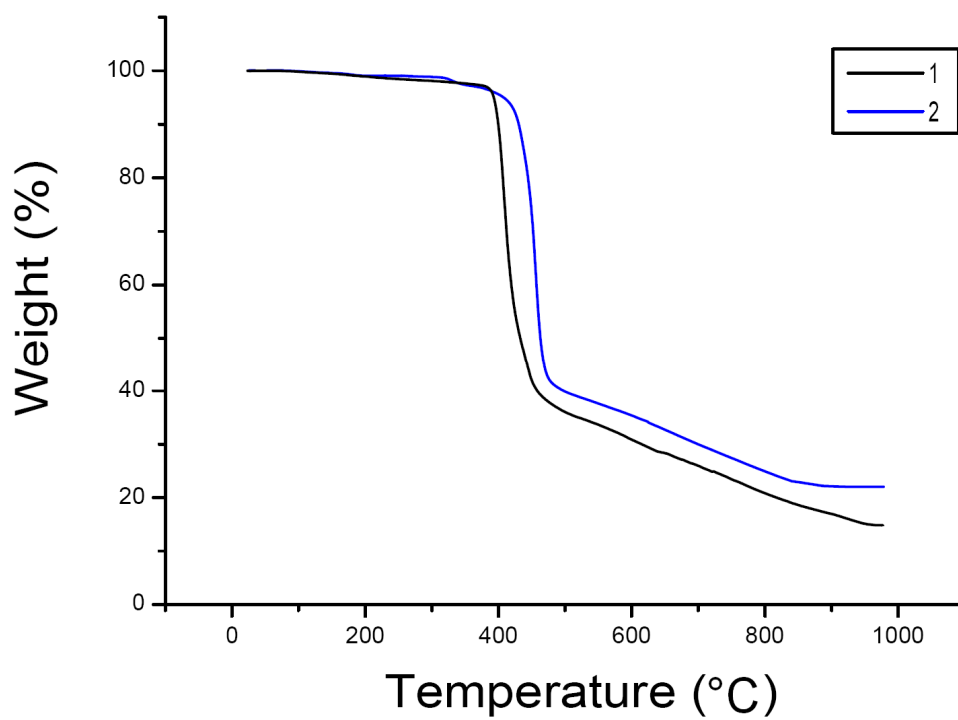

Supplement: b924647a.pdf [file b924647a.pdf]
